# Supplementary material
Source: PubMed Central journal article supplement (PMC6792359)
Supplement: ehp-127-087006-s001.pdf [file ehp-127-087006-s001.pdf]

**Note to readers with disabilities:** *EHP* strives to ensure that all journal content is accessible to all readers. However, some figures and Supplemental Material published in *EHP* articles may not conform to [508 standards](#) due to the complexity of the information being presented. If you need assistance accessing journal content, please contact [ehp508@niehs.nih.gov](mailto:ehp508@niehs.nih.gov). Our staff will work with you to assess and meet your accessibility needs within 3 working days.

### **Supplemental Material**

#### **Per- and Polyfluoroalkyl Substance Plasma Concentrations and Bone Mineral Density in Midchildhood: A Cross-Sectional Study (Project Viva, United States)**

Rachel Cluett, Shravanthi M. Seshasayee, Lisa B. Rokoff, Sheryl L. Rifas-Shiman, Xiaoyun Ye, Antonia M. Calafat, Diane R. Gold, Brent Coull, Catherine M. Gordon, Clifford J. Rosen, Emily Oken, Sharon K. Sagiv, and Abby F. Fleisch

#### **Table of Contents**

**Table S1.** Characteristics of Project Viva participants who attended the midchildhood visit (n=1,116) and who were included (n=576) versus excluded (n=540) from this analysis.

**Table S2.** Variables that did not confound the PFAS-aBMD association, overall (n=576) and by quartiles of perfluorooctanoate (PFOA) plasma concentration in midchildhood.

**Table S3.** Per- and polyfluoroalkyl substance (PFAS) plasma concentration distributions and Spearman correlation coefficients.

**Table S4.** Associations of per- and polyfluoroalkyl substance (PFAS) plasma concentrations with areal bone mineral density (aBMD) Z-score in midchildhood in (1) single PFAS models, (2) with further adjustment for maternal plasma PFAS concentration, and (3) by sex.  $\beta$  (95% CIs) represent difference in aBMD Z-score per doubling of PFAS plasma concentration.

**Figure S1.** Comparison of effect estimates from single per- and polyfluoroalkyl substance (PFAS) models examining associations between PFAS plasma concentrations and aBMD Z-score in midchildhood, with and without additional adjustment for variables that were considered but not included in the primary analysis.

**Figure S2.** Single PFAS models showing adjusted associations of per- and polyfluoroalkyl substance (PFAS) plasma concentrations with bone mineral content (BMC) Z-score in midchildhood (n=531).

**Table S1.** Characteristics of Project Viva participants who attended the midchildhood visit (n=1,116) and who were included (n=576) versus excluded (n=540) from this analysis.

|                                              | Attended the midchildhood visit (n=1,116) |                    | Subset included in analysis (n=576) |                    | Subset excluded from analysis (n=540) |                    |
|----------------------------------------------|-------------------------------------------|--------------------|-------------------------------------|--------------------|---------------------------------------|--------------------|
|                                              | N                                         | Mean ± SD or n (%) | N                                   | Mean ± SD or n (%) | N                                     | Mean ± SD or n (%) |
| <b>Maternal/neighborhood characteristics</b> |                                           |                    |                                     |                    |                                       |                    |
| Maternal age at enrollment (years)           | 1116                                      | 32.1 ± 5.4         | 576                                 | 31.8 ± 5.7         | 540                                   | 32.4 ± 5.0         |
| College graduate (%)                         | 1110                                      | 754 (68)           | 572                                 | 364 (64)           | 538                                   | 390 (72)           |
| Census tract median household income (%)     | 1109                                      |                    | 570                                 |                    | 539                                   |                    |
| < US\$ 30,000                                |                                           | 55 (5)             |                                     | 35 (6)             |                                       | 20 (4)             |
| US\$ 30,000-59,999                           |                                           | 467 (42)           |                                     | 248 (43)           |                                       | 219 (41)           |
| US\$ 60,000-99,999                           |                                           | 487 (44)           |                                     | 244 (42)           |                                       | 243 (45)           |
| ≥ US\$ 100,000                               |                                           | 100 (9)            |                                     | 43 (8)             |                                       | 57 (11)            |
| Individual household income (%)              | 1043                                      |                    | 543                                 |                    | 500                                   |                    |
| < US\$ 40,000                                |                                           | 129 (12)           |                                     | 85 (16)            |                                       | 44 (9)             |
| US\$ 40,001-70,000                           |                                           | 142 (14)           |                                     | 89 (16)            |                                       | 53 (11)            |
| > US\$ 70,000                                |                                           | 772 (74)           |                                     | 369 (68)           |                                       | 403 (81)           |
| <b>Child characteristics</b>                 |                                           |                    |                                     |                    |                                       |                    |
| Age (years)                                  | 876                                       | 7.9 ± 0.8          | 576                                 | 7.9 ± 0.8          | 300                                   | 7.9.0 ± 0.8        |
| Female (%)                                   | 1116                                      | 557 (50)           | 576                                 | 280 (49)           | 540                                   | 277 (51)           |
| Race/ethnicity (%)                           | 1114                                      |                    | 574                                 |                    | 540                                   |                    |
| White                                        |                                           | 707 (63)           |                                     | 328 (57)           |                                       | 379 (70)           |
| Black                                        |                                           | 189 (17)           |                                     | 129 (22)           |                                       | 60 (11)            |
| Asian                                        |                                           | 38 (3)             |                                     | 14 (2)             |                                       | 24 (4)             |
| Hispanic                                     |                                           | 48 (4)             |                                     | 34 (6)             |                                       | 14 (3)             |
| Other                                        |                                           | 132 (12)           |                                     | 69 (12)            |                                       | 63 (12)            |
| Dairy intake (servings per week)             | 1059                                      | 2.3 ± 1.5          | 554                                 | 2.2 ± 1.5          | 505                                   | 2.4 ± 1.5          |
| Physical activity (hours per week)           | 1063                                      | 1.8 ± 1.3          | 554                                 | 1.9 ± 1.4          | 509                                   | 1.7 ± 1.2          |
| Year of blood draw (%)                       | 760                                       |                    | 576                                 |                    | 184                                   |                    |
| 2007                                         |                                           | 77 (10)            |                                     | 64 (11)            |                                       | 13 (7)             |
| 2008                                         |                                           | 255 (34)           |                                     | 203 (35)           |                                       | 52 (28)            |
| 2009                                         |                                           | 252 (33)           |                                     | 189 (33)           |                                       | 63 (34)            |
| 2010                                         |                                           | 176 (24)           |                                     | 120 (21)           |                                       | 56 (30)            |
| aBMD Z-score                                 | 876                                       | -0.85 ± 0.78       | 576                                 | -0.86 ± 0.77       | 300                                   | -0.84 ± 0.79       |

Abbreviations: aBMD – areal bone mineral density; SD – standard deviation

**Table S2:** Variables that did not confound the PFAS-aBMD association, overall (n=576) and by quartiles of perfluorooctanoate (PFOA) plasma concentration in midchildhood

|                                      | <b>Quartiles of PFOA<sup>a</sup></b> |                           |                     |                     |                     |
|--------------------------------------|--------------------------------------|---------------------------|---------------------|---------------------|---------------------|
|                                      | <b>Overall<sup>b</sup><br/>n=576</b> | <b>Q1<br/>n=145</b>       | <b>Q2<br/>n=147</b> | <b>Q3<br/>n=140</b> | <b>Q4<br/>n=144</b> |
|                                      | <b>Mean ± SD<br/>or n (%)</b>        | <b>Mean ± SD or n (%)</b> |                     |                     |                     |
| Breastfeeding duration (months)      | 6.3 ± 4.5                            | 4.6 ± 4.1                 | 6.3 ± 4.6           | 6.8 ± 4.4           | 7.4 ± 4.5           |
| Soda intake (servings per week)      | 0.1 ± 0.2                            | 0.1 ± 0.2                 | 0.1 ± 0.1           | 0.1 ± 0.2           | 0.1 ± 0.3           |
| Secondhand smoke exposure            |                                      |                           |                     |                     |                     |
| < 1 hour                             | 530 (95)                             | 126 (94)                  | 137 (96)            | 130 (96)            | 137 (97)            |
| ≥ 1 hour                             | 25 (5)                               | 8 (6)                     | 6 (4)               | 6 (4)               | 5 (3)               |
| 25(OH)D plasma concentration (ng/mL) | 26.8 ± 7.7                           | 24.2 ± 7.1                | 26.4 ± 7.5          | 27.6 ± 8.0          | 29.2 ± 7.4          |

Abbreviations: Q1 – first/lowest quartile; SD – standard deviation; 25(OH)D – 25-hydroxyvitamin D

<sup>a</sup> PFOA quartile minimum and maximum values: <0.1 (LOD)-3.0 ng/mL for Q1, 3.1-4.4 ng/mL for Q2, 4.5-6.1 ng/mL for Q3, and 6.2-14.3 ng/mL for Q4

<sup>b</sup> Missing data for participants overall (n = 576): 30 missing 25(OH)D plasma concentration, 49 breastfeeding duration, 25 soda intake, 21 secondhand smoke exposure

**Table S3.** Per- and polyfluoroalkyl substance (PFAS) plasma concentration distributions and Spearman correlation coefficients.

| <b>PFAS plasma concentrations (ng/mL)</b>   |                   |                   |                    |              |                    |             |
|---------------------------------------------|-------------------|-------------------|--------------------|--------------|--------------------|-------------|
|                                             | <b>PFOA</b>       | <b>PFOS</b>       | <b>PFDA</b>        | <b>PFHxS</b> | <b>MeFOSAA</b>     | <b>PFNA</b> |
| <b>Median (IQR)</b>                         | 4.4 (3.2)         | 6.4 (5.6)         | 0.3 (0.3)          | 1.9 (2.3)    | 0.3 (0.5)          | 1.5 (1.2)   |
| <b>5<sup>th</sup> percentile</b>            | 1.9               | 2.1               | < LOD <sup>a</sup> | 0.6          | < LOD <sup>a</sup> | 0.7         |
| <b>95<sup>th</sup> percentile</b>           | 9.8               | 18.7              | 0.7                | 14.7         | 1.9                | 5.1         |
| <b>Detection frequency (%) <sup>b</sup></b> | 99.5 <sup>c</sup> | 99.5 <sup>c</sup> | 88.4               | 99.5         | 65.6               | 99.5        |
| <b>Spearman correlation coefficients</b>    |                   |                   |                    |              |                    |             |
| <b>PFOA</b>                                 | 1.00              |                   |                    |              |                    |             |
| <b>PFOS</b>                                 | 0.79              | 1.00              |                    |              |                    |             |
| <b>PFDA</b>                                 | 0.69              | 0.59              | 1.00               |              |                    |             |
| <b>PFHxS</b>                                | 0.60              | 0.67              | 0.34               | 1.00         |                    |             |
| <b>MeFOSAA</b>                              | 0.50              | 0.63              | 0.32               | 0.37         | 1.00               |             |
| <b>PFNA</b>                                 | 0.43              | 0.35              | 0.57               | 0.13         | 0.22               | 1.00        |

Abbreviations: PFAS – Per- and polyfluoroalkyl substances; PFOA – Perfluorooctanoic acid; PFOS – Perfluorooctane sulfonic acid; PFDA – Perfluorodecanoate; PFHxS – Perfluorohexane sulfonate; MeFOSAA – 2-(N-methyl-perfluorooctane sulfonamido) acetate; PFNA – Perfluorononanoate

<sup>a</sup> The limit of detection (LOD) was 0.1 ng/mL for all PFASs

<sup>b</sup> Within this analytic dataset (n=576).

<sup>c</sup> Detection frequencies for linear and branched isomer components from which total PFOA and PFOS concentrations were obtained: n-perfluorooctanoate (n-PFOA): 99.5%; sum of perfluoromethylheptanoates and perfluorodimethylhexanoates (Sb-PFOA): 58.5%; n-perfluorooctane sulfonic acid (n-PFOS): 99.5%; sum of perfluoromethylheptane sulfonates (Sm-PFOS): 99.5%; sum of perfluorodimethylhexane sulfonates (Sm2-PFOS): 1.2%

**Table S4.** Associations of per- and polyfluoroalkyl substance (PFAS) plasma concentrations with areal bone mineral density (aBMD) Z-score in midchildhood in (1) single PFAS models, (2) with further adjustment for maternal plasma PFAS concentration, and (3) by sex.  $\beta$  (95% CIs) represent difference in aBMD Z-score per doubling of PFAS plasma concentration.

| PFAS                                             | Covariate-adjusted<br>single PFAS models<br><i>n</i> = 531 | Additionally adjusted for<br>maternal PFAS<br><i>n</i> = 423 | Stratified by sex       |                        | Interaction term<br>p-value |
|--------------------------------------------------|------------------------------------------------------------|--------------------------------------------------------------|-------------------------|------------------------|-----------------------------|
|                                                  |                                                            |                                                              | Girls<br><i>n</i> = 280 | Boys<br><i>n</i> = 296 |                             |
| <i>Effect estimate (95% confidence interval)</i> |                                                            |                                                              |                         |                        |                             |
| PFOA                                             | -0.16 (-0.25, -0.06)                                       | -0.18 (-0.28, -0.07)                                         | -0.24 (-0.4, -0.07)     | -0.11 (-0.23, 0.00)    | 0.27                        |
| PFOS                                             | -0.08 (-0.16, -0.01)                                       | -0.10 (-0.18, -0.02)                                         | -0.12 (-0.25, 0.00)     | -0.06 (-0.16, 0.03)    | 0.52                        |
| PFDA                                             | -0.09 (-0.16, -0.02)                                       | N/A <sup>a</sup>                                             | -0.14 (-0.25, -0.03)    | -0.04 (-0.14, 0.06)    | 0.28                        |
| PFHxS                                            | -0.02 (-0.07, 0.03)                                        | -0.03 (-0.09, 0.04)                                          | -0.01 (-0.1, 0.08)      | -0.04 (-0.11, 0.03)    | 0.68                        |
| MeFOSAA                                          | -0.04 (-0.08, 0.01)                                        | -0.04 (-0.09, 0.01)                                          | -0.06 (-0.12, 0.01)     | -0.01 (-0.07, 0.05)    | 0.40                        |
| PFNA                                             | 0.02 (-0.06, 0.09)                                         | 0.01 (-0.08, 0.09)                                           | 0.01 (-0.11, 0.13)      | 0.02 (-0.08, 0.11)     | 0.83                        |

Abbreviations: PFAS – Per- and polyfluoroalkyl substances; PFOA – Perfluorooctanoic acid; PFOS – Perfluorooctane sulfonic acid; PFDA – Perfluorodecanoate; PFHxS – Perfluorohexane sulfonate; MeFOSAA – 2-(N-methyl-perfluorooctane sulfonamido) acetate; PFNA – Perfluorononanoate

<sup>a</sup> We were unable to adjust for maternal plasma concentrations of PFDA because maternal concentrations were above the LOD for < 60% of maternal samples.

All models adjusted for maternal age, education, individual household income, census tract median household income, and child age, sex, race/ethnicity, physical activity, dairy intake, and year of blood draw (sex-specific models do not include child sex as a covariate)

**Figure S1:** Comparison of effect estimates from single per- and polyfluoroalkyl substance (PFAS) models examining associations between PFAS plasma concentrations and aBMD Z-score in midchildhood, with and without additional adjustment for variables that were considered but not included in the primary analysis <sup>a</sup>

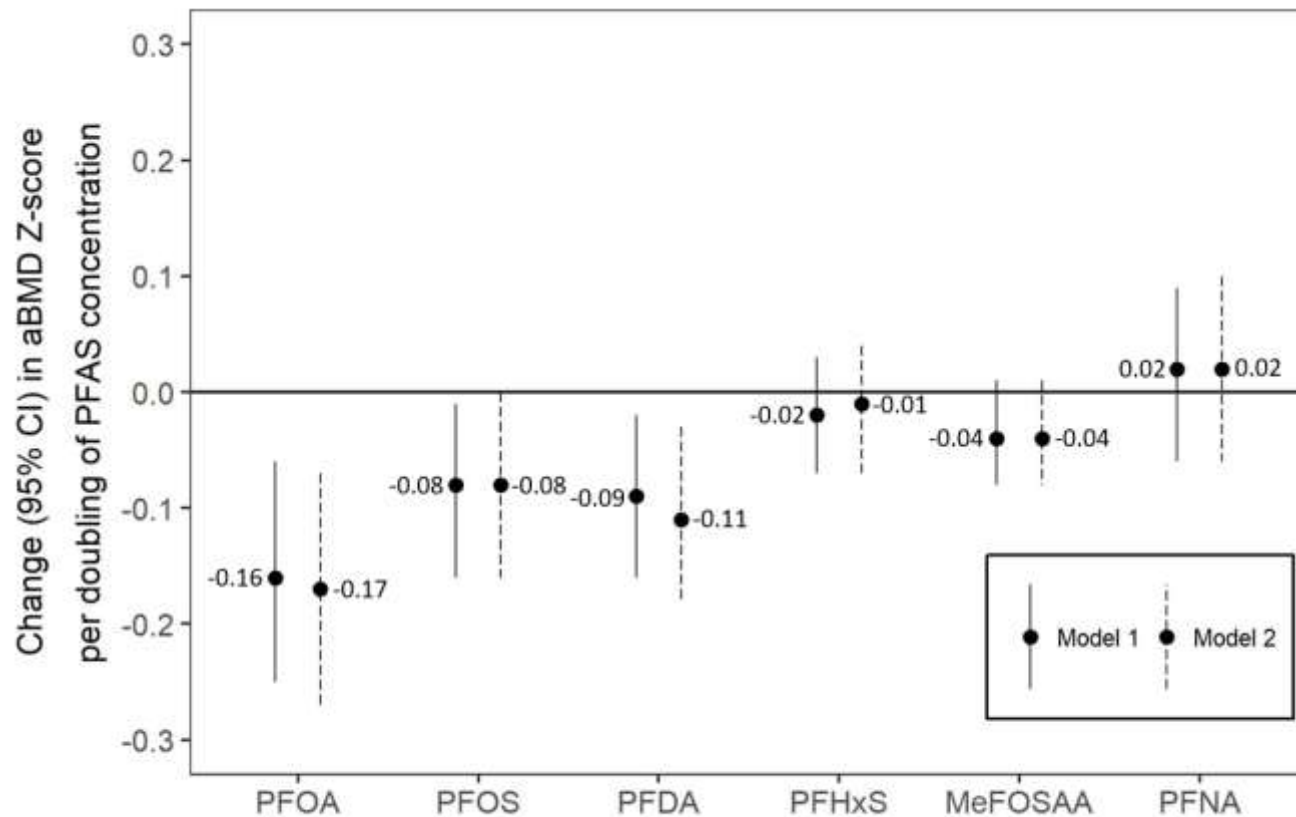

Abbreviations: PFOA – Perfluorooctanoic acid; PFOS – Perfluorooctane sulfonic acid; PFDA – Perfluorodecanoate; PFHxS – Perfluorohexane sulfonate; MeFOSAA – 2-(N-methyl-perfluorooctane sulfonamido) acetate; PFNA – Perfluorononanoate

<sup>a</sup> Model 1: Adjusted for maternal age, education, individual household income, census tract median household income, and child age, sex, race/ethnicity, physical activity, dairy intake, and year of blood draw (n = 531)

Model 2: Additionally adjusted for breastfeeding duration, soda intake, secondhand smoke exposure, and 25-hydroxyvitamin D plasma concentration (n = 463)

**Figure S2.** Single PFAS models showing adjusted associations of per- and polyfluoroalkyl substance (PFAS) plasma concentrations with bone mineral content (BMC) Z-score in midchildhood (n=531).<sup>a</sup>

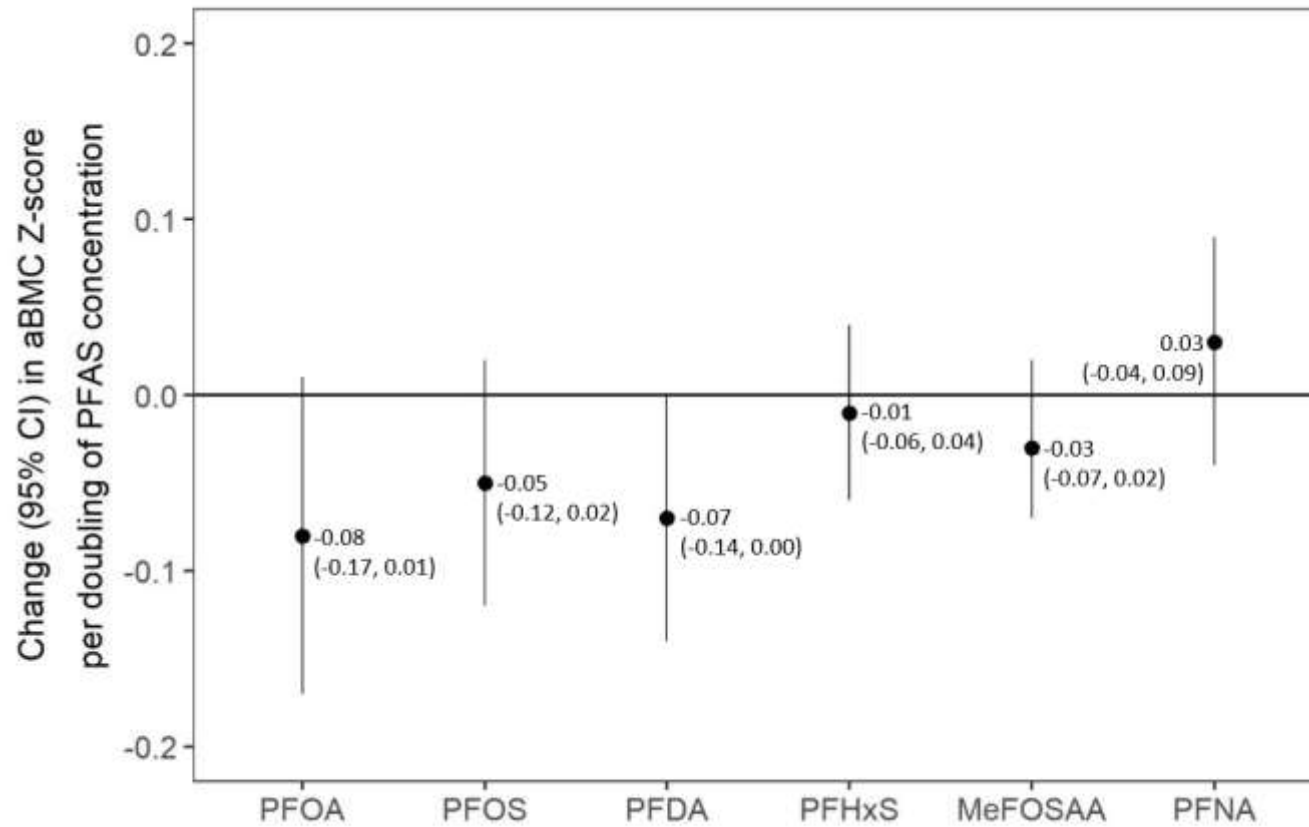

Abbreviations: PFOA – Perfluorooctanoic acid; PFOS – Perfluorooctane sulfonic acid; PFDA – Perfluorodecanoate; PFHxS – Perfluorohexane sulfonate; MeFOSAA – 2-(N-methyl-perfluorooctane sulfonamido) acetate; PFNA – Perfluorononanoate

<sup>a</sup>Adjusted for maternal age, education, individual household income, census tract median household income, and child age, sex, race/ethnicity, dairy intake, physical activity, and year of blood draw.
