# Supplementary material
Source: PubMed Central journal article supplement (PMC6792359)
Supplement: ehp-127-087006-s002.pdf [file ehp-127-087006-s002.pdf]

**Note to readers with disabilities:** *EHP* strives to ensure that all journal content is accessible to all readers. However, some figures and Supplemental Material published in *EHP* articles may not conform to [508 standards](#) due to the complexity of the information being presented. If you need assistance accessing journal content, please contact [ehp508@niehs.nih.gov](mailto:ehp508@niehs.nih.gov). Our staff will work with you to assess and meet your accessibility needs within 3 working days.

### **Supplemental Material**

#### **Per- and Polyfluoroalkyl Substance Plasma Concentrations and Bone Mineral Density in Midchildhood: A Cross-Sectional Study (Project Viva, United States)**

Rachel Cluett, Shravanthi M. Seshasayee, Lisa B. Rokoff, Sheryl L. Rifas-Shiman, Xiaoyun Ye, Antonia M. Calafat, Diane R. Gold, Brent Coull, Catherine M. Gordon, Clifford J. Rosen, Emily Oken, Sharon K. Sagiv, and Abby F. Fleisch

#### **Table of Contents**

**Table S1.** Characteristics of Project Viva participants who attended the midchildhood visit (n=1,116) and who were included (n=576) versus excluded (n=540) from this analysis.

**Table S2.** Variables that did not confound the PFAS-aBMD association, overall (n=576) and by quartiles of perfluorooctanoate (PFOA) plasma concentration in midchildhood.

**Table S3.** Per- and polyfluoroalkyl substance (PFAS) plasma concentration distributions and Spearman correlation coefficients.

**Table S4.** Associations of per- and polyfluoroalkyl substance (PFAS) plasma concentrations with areal bone mineral density (aBMD) Z-score in midchildhood in (1) single PFAS models, (2) with further adjustment for maternal plasma PFAS concentration, and (3) by sex.  $\beta$  (95% CIs) represent difference in aBMD Z-score per doubling of PFAS plasma concentration.

**Figure S1.** Comparison of effect estimates from single per- and polyfluoroalkyl substance (PFAS) models examining associations between PFAS plasma concentrations and aBMD Z-score in midchildhood, with and without additional adjustment for variables that were considered but not included in the primary analysis.

**Figure S2.** Single PFAS models showing adjusted associations of per- and polyfluoroalkyl substance (PFAS) plasma concentrations with bone mineral content (BMC) Z-score in midchildhood (n=531).
